# Supplementary material for: Prevalence of Locomotive Organ Impairment and Associated Factors among Middle-Aged and Older People in Nan Province, Thailand
Source: MDPI journal article supplement (doi:10.3390/ijerph182010871), 2021-10-15
Supplement: s1 [file s1]

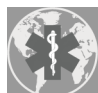

Supplemental Online Table S1. Socio-demographic characteristics of the participants ( $n = 165$ )

|                                                                 | Variables                               | $n$ | %    |
|-----------------------------------------------------------------|-----------------------------------------|-----|------|
| <b>Age</b><br>Mean $\pm$ SD: $65.2 \pm 8.1$                     | 50–59                                   | 40  | 24.2 |
|                                                                 | 60–69                                   | 68  | 41.2 |
|                                                                 | 70–79                                   | 49  | 29.7 |
|                                                                 | $\geq 80$                               | 3   | 1.8  |
| <b>Sex</b>                                                      | Male                                    | 51  | 30.9 |
|                                                                 | Female                                  | 114 | 69.1 |
| <b>Marital status</b>                                           | Single                                  | 14  | 8.5  |
|                                                                 | Married                                 | 112 | 67.9 |
|                                                                 | Widowed                                 | 33  | 20.0 |
|                                                                 | Divorced (separated)                    | 6   | 3.6  |
| <b>Number of Family members</b><br>Mean $\pm$ SD: $3.4 \pm 1.6$ | 1                                       | 7   | 4.2  |
|                                                                 | 2                                       | 51  | 30.9 |
|                                                                 | 3–5                                     | 92  | 55.8 |
|                                                                 | $\geq 6$                                | 15  | 9.1  |
| <b>Educational Attainment</b>                                   | Primary school completed                | 99  | 60.0 |
|                                                                 | Secondary school completed              | 32  | 16.4 |
|                                                                 | Vocational completed                    | 6   | 3.6  |
| <b>Years of schooling</b><br>Median 6.7 (IQR: 4.0–9.0)          | University, bachelor's degree completed | 19  | 11.5 |
|                                                                 | University and above completed          | 1   | 0.6  |
|                                                                 | No school                               | 8   | 4.9  |
|                                                                 | Financially difficult                   | 10  | 6.2  |
| <b>Economic status</b><br>( $n = 161$ )                         | Slightly difficult                      | 55  | 34.2 |
|                                                                 | Slightly comfortable                    | 46  | 28.9 |
|                                                                 | Financially comfortable                 | 50  | 31.1 |
|                                                                 | Agriculture                             | 41  | 24.9 |
| <b>Current job</b>                                              | Labour                                  | 28  | 17.0 |
|                                                                 | Merchant                                | 21  | 12.7 |
|                                                                 | Housewife                               | 8   | 4.9  |
|                                                                 | Desk work                               | 0   | 0.0  |
|                                                                 | Other                                   | 4   | 2.4  |
|                                                                 | Unemployed                              | 63  | 38.2 |
|                                                                 | Hypertension                            | 89  | 54.6 |
| <b>Comorbidities</b><br>( $n = 163$ )                           | Hyperlipidaemia                         | 60  | 36.8 |
|                                                                 | Diabetes                                | 34  | 20.9 |
|                                                                 | Cardiovascular disease                  | 5   | 3.1  |

---

|                               |                                       |     |      |
|-------------------------------|---------------------------------------|-----|------|
|                               | Stroke                                | 4   | 2.5  |
|                               | Chronic obstructive pulmonary disease | 2   | 1.2  |
|                               | Cancer                                | 2   | 1.2  |
|                               | Other                                 | 17  | 10.4 |
|                               | No underlying disease                 | 51  | 31.3 |
| <b>BMI (kg/m<sup>2</sup>)</b> | <18.5                                 | 6   | 3.6  |
| Mean ± SD: 24.0 ± 3.4         | 18.5–24.9                             | 100 | 60.6 |
|                               | ≥25.0                                 | 59  | 35.8 |

---

SD, standard deviation; IQR, interquartile range; BMI, body mass index
